# Supplementary material
Source: PubMed Central journal article supplement (PMC8556313)
Supplement: NIHMS1734674-supplement-Supplementary_Figures.pdf [file NIHMS1734674-supplement-Supplementary_Figures.pdf]

# Supplementary Figure 1

## A

### DISTRIBUTION OF ALL 157 HL VARIANTS IN THIS STUDY

- Single or Multi VUS
- LB/B v P/LP
- VUS v LB/B
- VUS v LP/P
- VUS v LB/B v LP/P
- No Conflicts

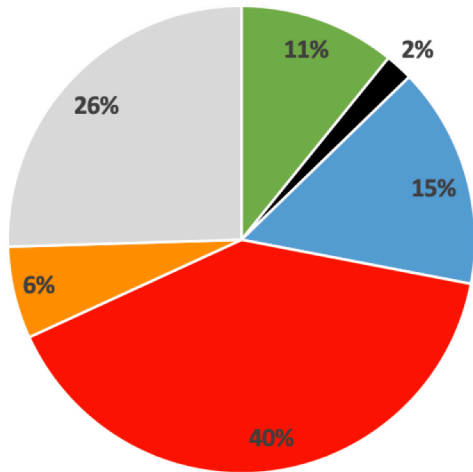

## B

### DISTRIBUTION OF VARIANTS BY GENE

- CDH23
- COCH
- GJB2
- KCNQ4
- MYO6
- MYO7A
- SLC26A4
- TECTA
- USH2A

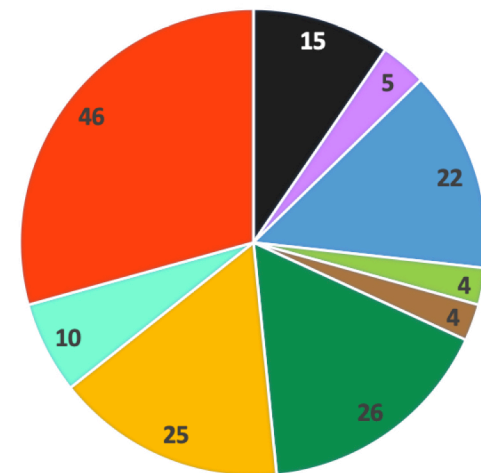

# Supplementary Figure 2

**A**

ACMG/AMP Codes Used by the Hearing Loss VCEP to Classify 157 Variants

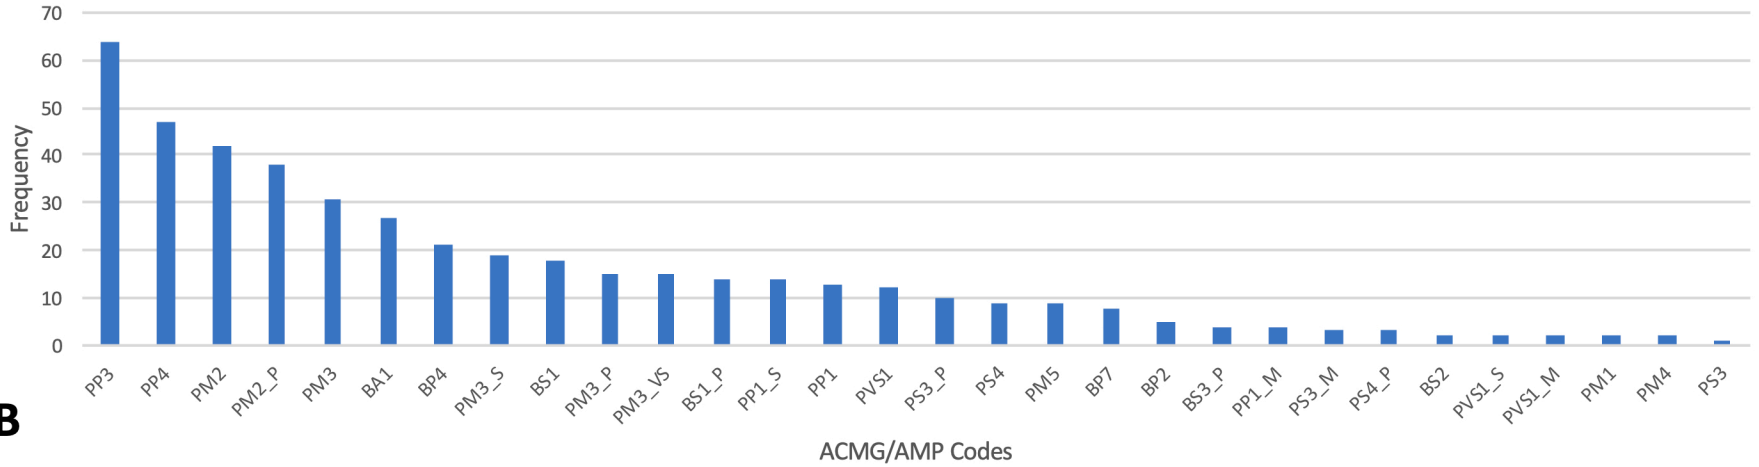

**B**

ACMG/AMP Code Contribution Towards the HL VCEP Final Classification

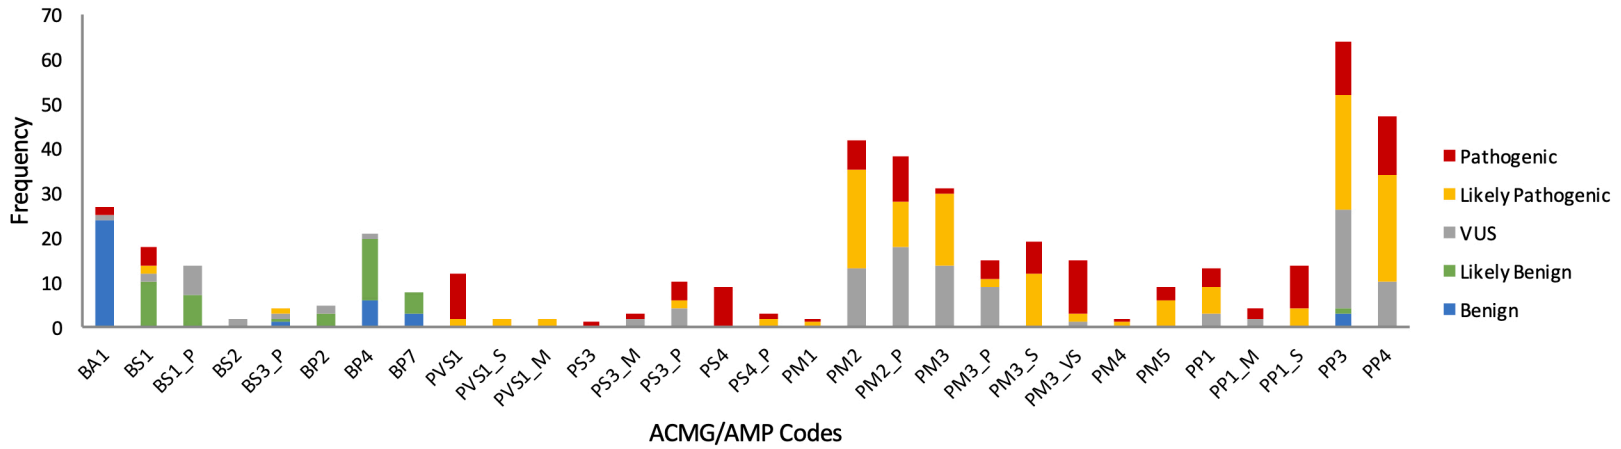

**Supplementary Figure 1.** *A*, Distribution of all 157 variants by conflict type. *B*, Distribution of variant by gene. VUS, Variant of Uncertain Significance; B, Benign; LB, Likely Benign; P, Pathogenic; LP, Likely Pathogenic.

**Supplementary Figure 2.** Usage (*A*) and contribution (*B*) of the different ACMG/AMP codes, specified by the HL EP, to the final variant classification.
